# Supplementary material for: National Antibiotics Utilization Trends for Human Use in Tanzania from 2010 to 2016 Inferred from Tanzania Medicines and Medical Devices Authority Importation Data
Source: MDPI journal article supplement (doi:10.3390/antibiotics10101249), 2021-10-15
Supplement: s1 [file s1]

## Supplementary Material

**Supplementary Table S1: Population estimates for Tanzania 2010 – 2017 according to the Tanzania Bureau of Statistics (TBS)**

| Year | Estimated population |
|------|----------------------|
| 2010 | 46,100,000           |
| 2011 | 47,570,000           |
| 2012 | 49,080,000           |
| 2013 | 50,640,000           |
| 2014 | 52,230,000           |
| 2015 | 53,880,000           |
| 2016 | 55,570,000           |

**Supplementary Table S2: Variation of Defined Daily Dose (DDD per 1000 inhabitants per day (DID) antibiotics per sector of purchase of antibiotics utilized in Tanzania from 2010-2016**

|                    | Defined Daily Dose (DDD per 1000 inhabitants per day (DID) |                    |                    |
|--------------------|------------------------------------------------------------|--------------------|--------------------|
| Year               | Public sector                                              | Private sector     | Grand Total        |
| 2010               | 0.315695124                                                | 6.462989723        | 6.778684846        |
| 2011               | 3.264509044                                                | 9.998647410        | 13.26315645        |
| 2012               | 1.250840438                                                | 8.530454799        | 9.781295237        |
| 2013               | 0.073671843                                                | 14.58051563        | 14.65418747        |
| 2014               | 2.017742880                                                | 27.84687869        | 29.86462157        |
| 2015               | 0.102752823                                                | 31.87673690        | 31.97948972        |
| 2016               | 2.613756117                                                | 45.57334786        | 48.18710398        |
| <b>Years total</b> | <b>9.638968269</b>                                         | <b>144.869571</b>  | <b>154.5085393</b> |
| <b>%</b>           | <b>6.238469611</b>                                         | <b>93.76153039</b> | <b>100</b>         |

**Supplementary Table S3: Variation of Defined Daily Dose (DDD per 1000 inhabitants per day (DID) antibiotics per dosage form of antibiotics utilized in Tanzania from 2010-2016**

| Dosage form/         | Defined Daily Dose (DDD per 1000 inhabitants per day (DID) |                    |                    |                    |                    |                    |                    | All year's         |
|----------------------|------------------------------------------------------------|--------------------|--------------------|--------------------|--------------------|--------------------|--------------------|--------------------|
| Year                 | 2010                                                       | 2011               | 2012               | 2013               | 2014               | 2015               | 2016               | total              |
| Capsule              | 4.14502603                                                 | 5.309291455        | 5.106272557        | 6.00690412         | 22.15500286        | 27.07317189        | 27.67566794        | 97.47133686        |
| Tablet               | 2.122573461                                                | 7.209185713        | 3.914566033        | 7.260900909        | 5.447574003        | 3.839556442        | 19.16005039        | 48.95440695        |
| Syrup                | 0.28356336                                                 | 0.529064846        | 0.419095874        | 0.533276424        | 0.98205372         | 0.869443006        | 0.966824426        | 4.583321657        |
| Injectable           | 0.216595104                                                | 0.202455566        | 0.306573632        | 0.784661864        | 1.27099537         | 0.186970845        | 0.336174748        | 3.304427128        |
| Solution             | 0.010744837                                                | 0.012516484        | 0.023937911        | 0.036285644        | 0.004262286        | 0.000001           | -                  | 0.08774784         |
| Powder               | 0.000180271                                                | 0.000642391        | 0.01062064         | 0.031460592        | 0.004732801        | 0.009004053        | 0.029945636        | 0.086586383        |
| Intravenous Infusion | 0.000002                                                   | -                  | 0.00022859         | 0.000697916        | 0.000001           | 0.001342812        | 0.018440836        | 0.020712461        |
| <b>Total</b>         | <b>6.778684846</b>                                         | <b>13.26315645</b> | <b>9.781295237</b> | <b>14.65418747</b> | <b>29.86462157</b> | <b>31.97948972</b> | <b>48.18710398</b> | <b>154.5085393</b> |

**Supplementary Table S4: Variation of amounts DIDs and kg of antivirals and antifungals utilized in Tanzania from 2010-2017**

| Rank | Medicine (ATC code level 5) | Defined Daily Dose (DDD) measurement units. Utilization was expressed in DDD per 1000 inhabitants per day (DID) |          |          |          |           |           |           |                 |
|------|-----------------------------|-----------------------------------------------------------------------------------------------------------------|----------|----------|----------|-----------|-----------|-----------|-----------------|
|      | Year                        | 2010                                                                                                            | 2011     | 2012     | 2013     | 2014      | 2015      | 2016      | All years total |
| 1    | Amoxicillin (J01CA04)       | 2.138265                                                                                                        | 2.732834 | 3.166120 | 2.906303 | 15.186938 | 8.460106  | 19.188346 | 53.778913       |
| 2    | Metronidazole (J01XD01)     | 0.719509                                                                                                        | 5.105518 | 0.921516 | 1.307620 | 1.569014  | 0.994656  | 13.243172 | 23.861005       |
| 3    | Tetracycline (J01AA07)      | 0.121011                                                                                                        | 0.349499 | 0.033493 | 0.211189 | 3.117376  | 14.126072 | 2.569880  | 20.528519       |
| 4    | Ciprofloxacin (J01MA02)     | 0.642624                                                                                                        | 0.857677 | 1.637936 | 1.224426 | 1.279803  | 1.195216  | 2.427715  | 9.265398        |
| 5    | Cefalexin (J01DB01)         | 0.021399                                                                                                        | 0.013309 | 0.019791 | 0.074673 | 1.470269  | 2.649437  | 2.693602  | 6.942480        |

|    |                                                      |          |          |          |          |          |          |          |          |
|----|------------------------------------------------------|----------|----------|----------|----------|----------|----------|----------|----------|
| 6  | Doxycycline (J01AA02)                                | 0.445702 | 0.698575 | 0.581497 | 0.772933 | 1.464953 | 0.750373 | 2.161038 | 6.875071 |
| 7  | Tinidazole (J01XD02)                                 | 0.206036 | 0.229824 | 0.344764 | 1.914793 | 0.625587 | 0.440550 | 1.477362 | 5.238916 |
| 8  | Ampicillin (J01CA01)                                 | 0.882168 | 1.182723 | 0.457627 | 0.438006 | 0.361189 | 0.920659 | 0.233299 | 4.475671 |
| 9  | Erythromycin (J01FA01)                               | 0.220473 | 0.324990 | 0.510476 | 0.330956 | 0.787203 | 0.481507 | 0.953598 | 3.609203 |
| 10 | Ampicillin + cloxacillin (J01CR50)                   | 0.108795 | 0.164541 | 0.433184 | 0.365566 | 0.854357 | 0.345550 | 1.187669 | 3.459662 |
| 11 | Sulfamethoxazole + trimethoprim (J01EE01)            | 0.114876 | 0.455251 | 0.009334 | 1.785802 | 0.005797 | 0.083260 | 0.001800 | 2.456121 |
| 12 | Cloxacillin (J01CF02)                                | 0.207602 | 0.321452 | 0.452528 | 1.282708 | 0.013342 |          | 0.003698 | 2.281330 |
| 13 | Phenoxymethyl penicillin (J01CE02)                   | 0.011937 | 0.064516 | 0.186077 | 0.338393 | 0.460273 | 0.243257 | 0.557363 | 1.861816 |
| 14 | Procaine benzylpenicillin (J01CE09)                  | 0.132676 | 0.120228 | 0.083775 | 0.256539 | 0.531735 | 0.046984 | 0.126253 | 1.298190 |
| 15 | Amoxicillin + clavulanate (J01CR02)                  | 0.082356 | 0.100458 | 0.140504 | 0.142044 | 0.232627 | 0.349376 | 0.231817 | 1.279183 |
| 16 | Azithromycin (J01FA10)                               | 0.094503 | 0.108884 | 0.114337 | 0.178926 | 0.246168 | 0.076106 | 0.179319 | 0.998243 |
| 17 | Benzathine penicillin (J01CE08)                      | 0.038184 | 0.041170 | 0.073368 | 0.121730 | 0.425541 | 0.078943 | 0.105260 | 0.884196 |
| 18 | Ampicillin + cloxacillin (J01CR50)                   | 0.044223 | 0.048281 | 0.065898 | 0.090380 | 0.143910 | 0.129011 | 0.154844 | 0.676548 |
| 19 | Levofloxacin (J01MA12)                               | 0.034375 | 0.038027 | 0.111927 | 0.136712 | 0.187886 |          |          | 0.508927 |
| 20 | Chloramphenicol (J01BA01)                            | 0.028010 | 0.023766 | 0.089806 | 0.144607 | 0.100552 | 0.050258 | 0.069742 | 0.506741 |
| 21 | Benzyl penicillin (J01CE01)                          | 0.003043 | 0.018718 | 0.060511 | 0.087510 | 0.092412 | 0.055496 | 0.093715 | 0.411406 |
| 22 | Gentamycin (J01GB03)                                 | 0.005098 | 0.001082 | 0.019909 | 0.152425 | 0.199343 | 0.000167 | 0.023951 | 0.401975 |
| 23 | Ofloxacin (J01MA01)                                  | 0.192910 | 0.035529 | 0.012030 | 0.021427 | 0.043066 | 0.074941 | 0.014443 | 0.394346 |
| 24 | Amoxicillin + flucloxacillin (J01CR50)               | 0.020743 | 0.053618 | 0.044492 | 0.050579 | 0.060377 | 0.084763 | 0.054888 | 0.369460 |
| 25 | Clarithromycin + lansoprazole + tinidazole (A02BD09) | 0.017254 | 0.021855 | 0.037003 | 0.033176 | 0.048569 | 0.045817 | 0.072146 | 0.275821 |
| 26 | Cefuroxime (J01DC02)                                 | 0.015055 | 0.021172 | 0.017329 | 0.051782 | 0.036431 | 0.071949 | 0.042467 | 0.256185 |
| 27 | Nitrofurantoin (J01XE01)                             | 0.000743 | 0.000014 |          | 0.005453 | 0.104910 | 0.006407 | 0.108366 | 0.225894 |
| 28 | Clarithromycin (J01FA09)                             | 0.011396 | 0.021169 | 0.018348 | 0.023908 | 0.046976 | 0.051667 | 0.041063 | 0.214527 |
| 29 | Cefadroxil (J01DB05)                                 | 0.022564 | 0.004272 | 0.008776 | 0.015943 | 0.037273 | 0.044224 | 0.028872 | 0.161923 |

|    |                                        |          |          |          |          |          |          |          |          |
|----|----------------------------------------|----------|----------|----------|----------|----------|----------|----------|----------|
| 30 | Ciprofloxacin + tinidazole (J01RA11)   | 0.020266 | 0.018430 | 0.020166 | 0.032732 | 0.032391 | 0.008771 | 0.013874 | 0.146629 |
| 31 | Ornidazole (J01XD03)                   | 0.012338 | 0.016220 | 0.016459 | 0.018232 | 0.022623 | 0.019889 | 0.035764 | 0.141526 |
| 32 | Cefixime (J01DD08)                     | 0.007226 | 0.011580 | 0.018225 | 0.018968 | 0.020195 | 0.015190 | 0.021848 | 0.113232 |
| 33 | Clindamycin (J01FF01)                  | 0.083110 | 0.001855 | 0.001134 | 0.003860 | 0.006826 | 0.004883 | 0.002234 | 0.103901 |
| 34 | Cefpodoxime (J01DD13)                  | 0.003836 | 0.003133 | 0.008052 | 0.008979 | 0.020799 | 0.032830 | 0.024726 | 0.102355 |
| 35 | Ceftriaxone (J01DD04)                  | 0.011348 | 0.002159 | 0.022192 | 0.038954 | 0.000017 | 0.000008 | 0.000080 | 0.074759 |
| 36 | Norfloxacin (J01MA06)                  | 0.009422 | 0.004034 | 0.007918 | 0.010087 | 0.018146 | 0.011025 | 0.012003 | 0.072634 |
| 37 | Ceftazidime (J01DD02)                  | 0.000004 | 0.000005 | 0.014425 | 0.035810 | 0.000026 | 0.000138 | 0.000004 | 0.050413 |
| 38 | Roxithromycin (J01FA06)                |          | 0.036802 | 0.003014 |          |          | 0.002792 |          | 0.042608 |
| 39 | Flucloxacillin (J01CF05)               | 0.001070 | 0.001885 | 0.000317 | 0.000177 | 0.000197 | 0.013781 | 0.012665 | 0.030091 |
| 40 | Perfloxacin (J01MA03)                  | 0.026149 |          |          |          |          |          |          | 0.026149 |
| 41 | Sparfloxacin (J01MA09)                 | 0.012622 |          | 0.010449 |          |          |          |          | 0.023070 |
| 42 | Nalidixic acid (J01MB02)               | 0.002309 | 0.002607 | 0.002409 | 0.004045 | 0.001915 | 0.005148 | 0.003507 | 0.021939 |
| 43 | Cefaclor (J01DC04)                     | 0.003584 | 0.003053 |          | 0.001601 | 0.001567 | 0.001623 | 0.003777 | 0.015204 |
| 44 | Linezolid (J01XX08)                    |          |          |          | 0.009671 | 0.001705 |          | 0.001104 | 0.012480 |
| 45 | Cefotaxime (J01DD01)                   | 0.000380 | 0.000316 | 0.000345 | 0.000257 | 0.000432 | 0.001872 | 0.004084 | 0.007687 |
| 46 | Cefprozil (J01DC10)                    | 0.000392 | 0.000317 | 0.000614 | 0.002040 | 0.000452 | 0.000647 | 0.001183 | 0.005646 |
| 47 | Sultamicillin (J01CR04)                | 0.000605 | 0.000475 | 0.000544 | 0.000598 | 0.000939 | 0.000140 | 0.000732 | 0.004032 |
| 48 | Meropenem (J01DH02)                    | 0.000049 | 0.000070 | 0.000111 | 0.000183 | 0.000513 | 0.001954 | 0.000919 | 0.003800 |
| 49 | Cefepime (J01DE01)                     | 0.000309 | 0.000204 | 0.001016 | 0.000670 | 0.000272 | 0.000292 | 0.000200 | 0.002962 |
| 50 | Amikacin (J01GB06)                     |          | 0.000254 | 0.000746 | 0.000284 |          | 0.000381 | 0.000185 | 0.001851 |
| 51 | Oxytetracycline combinations (J01AA56) |          | 0.000376 |          |          | 0.001385 |          |          | 0.001761 |
| 52 | Moxifloxacin (J01MA14)                 | 0.000091 | 0.000101 | 0.000095 | 0.000082 | 0.000001 |          | 0.000828 | 0.001197 |
| 53 | Ceftriaxone combinations (J01DD54)     |          |          |          |          |          | 0.000172 | 0.000961 | 0.001133 |
| 54 | Piperacillin + tazobactam (J01CR05)    | 0.000043 | 0.000037 | 0.000205 | 0.000280 | 0.000117 | 0.000061 | 0.000079 | 0.000822 |
| 55 | Cefoperazone, combinations (J01DD62)   |          |          |          |          | 0.000066 | 0.000443 | 0.000243 | 0.000752 |
| 56 | Vancomycin (J01XA01)                   |          | 0.000069 | 0.000165 | 0.000051 | 0.000122 | 0.000064 | 0.000160 | 0.000630 |
| 57 | Streptomycin (J01GA01)                 | 0.000000 | 0.000096 | 0.000237 |          | 0.000001 | 0.000001 | 0.000135 | 0.000469 |

---

|    |                                         |  |          |          |          |          |          |          |          |
|----|-----------------------------------------|--|----------|----------|----------|----------|----------|----------|----------|
| 58 | Ampicillin combination<br>(J01CA51)     |  |          | 0.000006 | 0.000020 | 0.000007 | 0.000381 |          | 0.000415 |
| 59 | Cefazolin (J01DB04)                     |  | 0.000000 |          | 0.000079 | 0.000022 | 0.000251 |          | 0.000353 |
| 60 | Chlortetracycline (J01AA03)             |  | 0.000125 | 0.000089 |          |          |          |          | 0.000214 |
| 61 | Trimethoprim (J01EA01)                  |  |          |          |          |          |          | 0.000119 | 0.000119 |
| 62 | Ampicillin + sulbactam<br>(J01CR01)     |  |          | 0.000006 | 0.000020 | 0.000006 | 0.000004 |          | 0.000037 |
| 63 | Spiramycin + metronidazole<br>(J01RA04) |  |          |          |          | 0.000000 |          |          | 0.000000 |

---

**Supplementary Table S5: The autoregressive integrated moving average (ARIMA) (0, 1, 0) model predicts the significant increase in utilization and forecasts the trends of antibiotics up to the period 2022 modeled using the data from 2010-2016. The model estimated that by 2022, the total of antibiotics consumed would reach 89.60 DID**

| Predicted total |                              | Lower confidence limits | Upper confidence limits |
|-----------------|------------------------------|-------------------------|-------------------------|
| Year            | DIDs of consumed antibiotics |                         |                         |
| 2010            |                              |                         |                         |
| 2011            | 13.68                        | -5.92                   | 33.28                   |
| 2012            | 20.16                        | 0.56                    | 39.76                   |
| 2013            | 16.68                        | -2.92                   | 36.28                   |
| 2014            | 21.55                        | 1.95                    | 41.15                   |
| 2015            | 36.76                        | 17.16                   | 56.36                   |
| 2016            | 38.88                        | 19.28                   | 58.48                   |
| 2017            | 55.09                        | 35.49                   | 74.69                   |
| 2018            | 61.99                        | 34.28                   | 89.71                   |
| 2019            | 68.9                         | 34.95                   | 102.84                  |
| 2020            | 75.8                         | 36.6                    | 114.99                  |
| 2021            | 82.7                         | 38.88                   | 126.52                  |
| 2022            | 89.6                         | 41.59                   | 137.61                  |
